# Supplementary material for: Identification of covalent modifications regulating immune signaling complex composition and phenotype
Source: PubMed Central journal article supplement (PMC8447602; doi:10.15252/msb.202010125), 2021-07-28
Supplement: MSB-17-e10125-s003.pdf [file MSB-17-e10125-s003.pdf]

## Appendix

### Table of content

**Appendix Figure S1: Interactions and PTMs of AKT1 in Human Monocytes**

**Appendix Figure S2: Interactions and PTMs of BCL10 in Human Monocytes**

**Appendix Figure S3: Interactions and PTMs of BIRC2 in Human Monocytes**

**Appendix Figure S4: Interactions and PTMs of CASP4, CASP5 in Human Monocytes**

**Appendix Figure S5: Interactions and PTMs of CASP7 in Human Monocytes**

**Appendix Figure S6: Interactions and PTMs of IFIH1 in Human Monocytes**

**Appendix Figure S7: Interactions and PTMs of IKBKE, TRAF6 in Human Monocytes**

**Appendix Figure S8: Interactions and PTMs of MAP3K8 in Human Monocytes**

**Appendix Figure S9: Interactions and PTMs of MYD88 in Human Monocytes**

**Appendix Figure S10: Interactions and PTMs of RIPK2 in Human Monocytes**

**Appendix Figure S11: Interactions and PTMs of RIPK3 in Human Monocytes**

**Appendix Figure S12: Interactions and PTMs of SYK in Human Monocytes**

**Appendix Figure S13: Interactions and PTMs of TIRAP in Human Monocytes**

**Appendix Figure S14: Interactions and PTMs of TRAF1 in Human Monocytes**

**Appendix Table S1: Oligonucleotides for pLOC cloning**

**Appendix Table S2: Oligonucleotides for site-directed mutagenesis of TRAF2**

**Appendix Table S3: Oligonucleotides for CRISPR Cas9 gene knockout**

**Appendix Table S4: Oligonucleotides for epitope tagging of MAPK14 with STREP-tag**

**Appendix Table S5: Recombinant DNA from Precision Lenti ORF Collection, GE Healthcare**

**Appendix Table S6: Recombinant DNA by Gene synthesis**

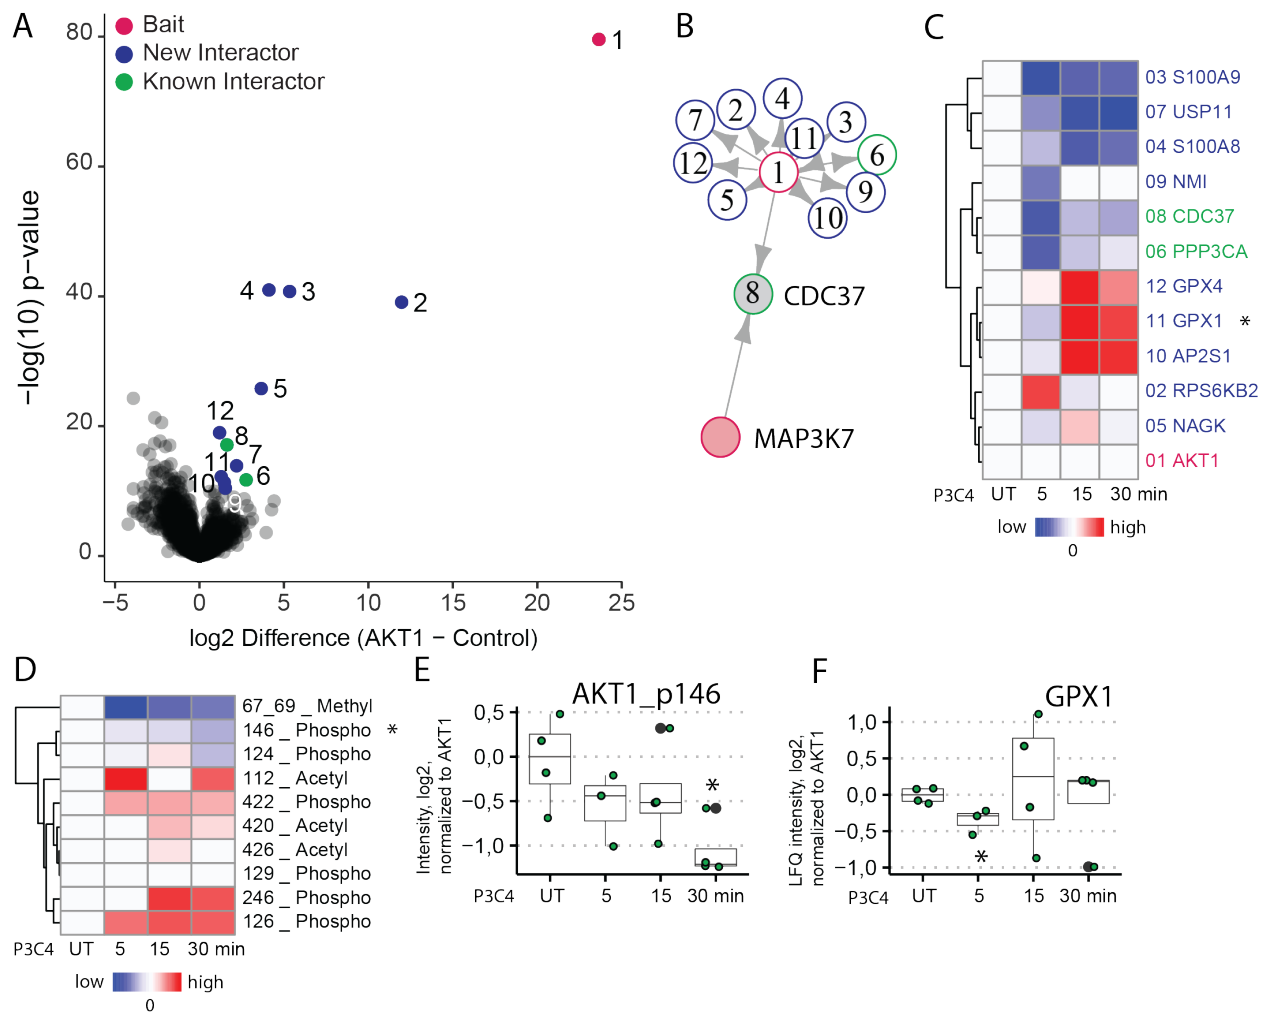

**Appendix Figure S1. Related to [Fig. 4, Table 1,2,3]: Interactions and PTMs of AKT1 in Human Monocytes.** (A) Volcano plot representing the interactome of AKT1 (measured 15x in biological replicates) compared against all other pull-downs in the control group. Significant interactors of AKT1 (two-tailed *t*-test, FDR < 0.01, enrichment >4) are colored in blue (novel interactors) and green (known interactors). (B) Interactors of TRAF2 (blue: novel interactors, green: known interactors) with interconnecting proteins between different baits colored in grey. (C) Heatmap of significant interactors of AKT1 upon TLR2 activation of human monocytes, with significant hits (two-tailed *t*-test, *p*-value < 0.05) denoted with an asterisk. (D) Heatmap of AKT1 PTMs (acetylation, methylation, and phosphorylation) upon TLR2 activation of human monocytes, with significant hits in at least one time-point (two-tailed *t*-test, *p*-value < 0.05) denoted with an asterisk. Cell activation was performed for 5, 15 and 30 min with the TLR2 ligand PAM3CSK4 (P3C4), UT was harvested after 30 min without Pam3CSK4 activation. (E) Intensity profile (normalized to AKT1 protein intensity and untreated) of the phosphorylation of AKT1 Thr146 upon TLR2 activation of human monocytes. (F) Lfq Intensity profile (normalized to AKT1 Lfq intensity and untreated) of AKT1 interactor GPX1 upon TLR2 activation of human monocytes (\*\*\*: *p*-value < 0.001, \*\*: *p*-value < 0.01, \*: *p*-value < 0.05).

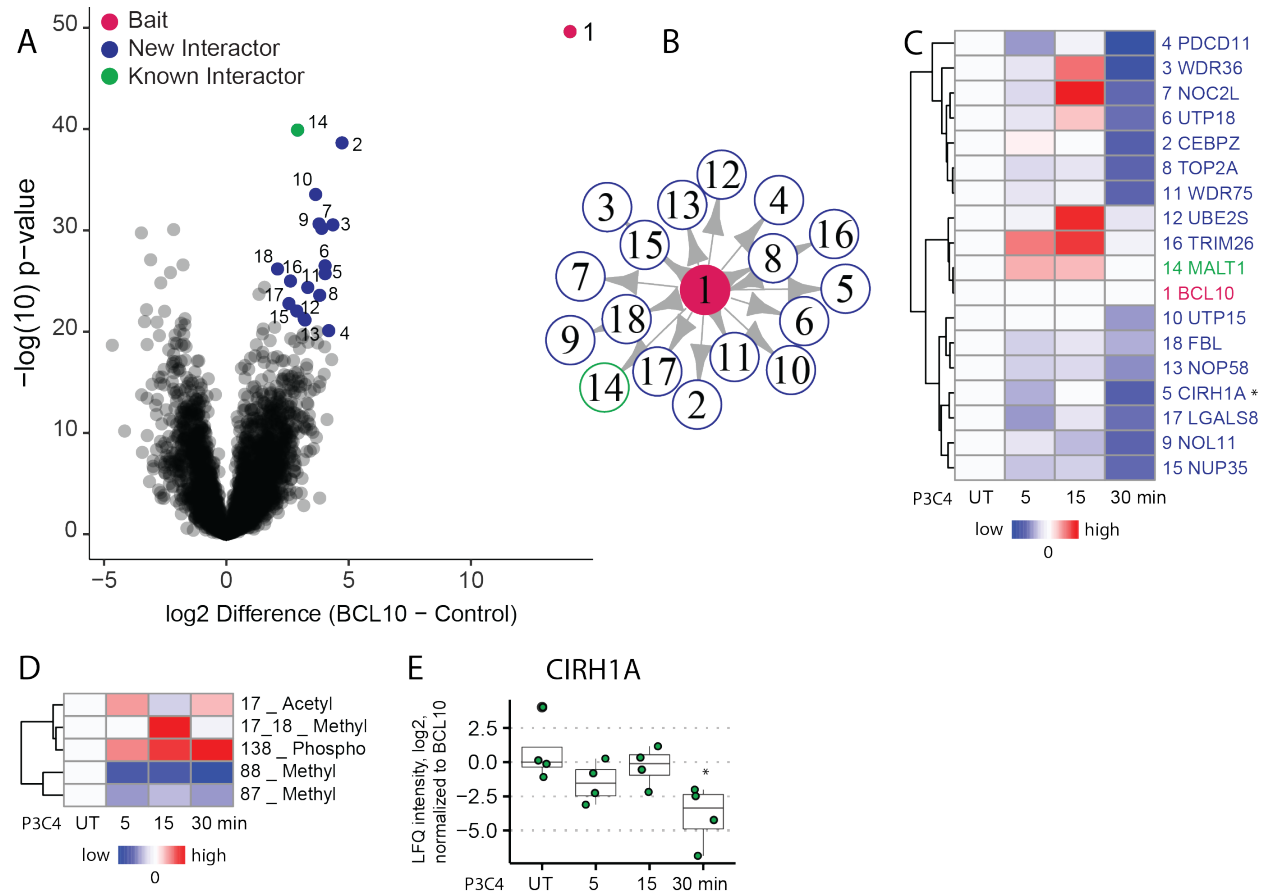

**Appendix Figure S2. Related to [Fig. 4, Table 1,2,3]: Interactions and PTMs of BCL10 in Human Monocytes.** (A) Volcano plot representing the interactome of BCL10 (measured 16x in biological replicates) compared against all other pull-downs in the control group. Significant interactors of BCL10 (two-tailed *t*-test, FDR < 0.01, enrichment >4) are colored in blue (novel interactors) and green (known interactors). (B) Interactors of TRAF2 (blue: novel interactors, green: known interactors) with interconnecting proteins between different baits colored in grey. (C) Heatmap of significant interactors of BCL10 upon TLR2 activation of human monocytes, with significant hits (two-tailed *t*-test, *p*-value < 0.05) denoted with an asterisk. (D) Heatmap of BCL10 PTMs (acetylation, methylation, and phosphorylation) upon TLR2 activation of human monocytes, with significant hits in at least one time-point (two-tailed *t*-test, *p*-value < 0.05) denoted with an asterisk. Cell activation was performed for 5, 15 and 30 min with the TLR2 ligand PAM3CSK4 (P3C4), UT was harvested after 30 min without Pam3CSK4 activation. (E) LFQ Intensity profile (normalized to BCL10 LFQ intensity and untreated) of BCL10 interactor CIRH1A upon TLR2 activation of human monocytes (\*\*\*: *p*-value < 0.001, \*\*: *p*-value < 0.01, \*: *p*-value < 0.05).

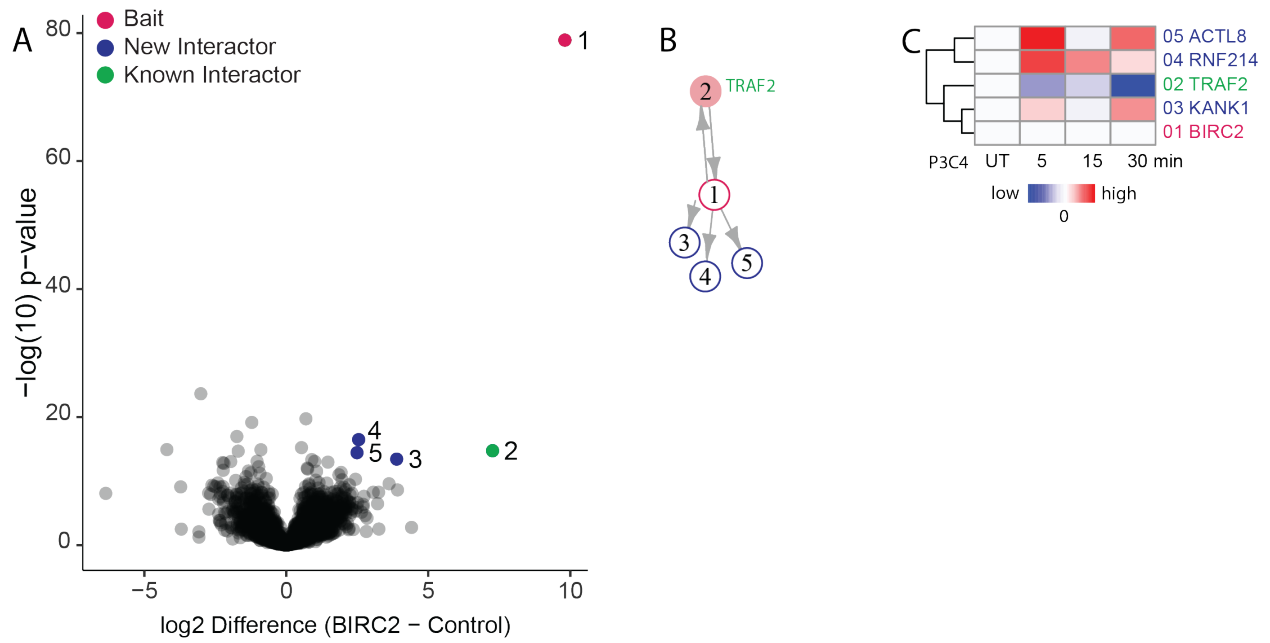

**Appendix Figure S3. Related to [Fig. 4, Table 1,2,3]: Interactions and PTMs of BIRC2 in Human Monocytes.** (A) Volcano plot representing the interactome of BIRC2 (measured 16x in biological replicates) compared against all other pull-downs in the control group. Significant interactors of BIRC2 (two-tailed *t*-test, FDR < 0.01, enrichment >4) are colored in blue (novel interactors) and green (known interactors). (B) Interactors of TRAF2 (blue: novel interactors, green: known interactors) with interconnecting proteins between different baits colored in grey. (C) Heatmap of significant interactors of BIRC2 upon TLR2 activation of human monocytes, with significant hits (two-tailed *t*-test, *p*-value < 0.05) denoted with an asterisk. Cell activation was performed for 5, 15 and 30 min with the TLR2 ligand PAM3CSK4 (P3C4), UT was harvested after 30 min without Pam3CSK4 activation. \*\*\*: *p*-value < 0.001, \*\*: *p*-value < 0.01, \*: *p*-value < 0.05).

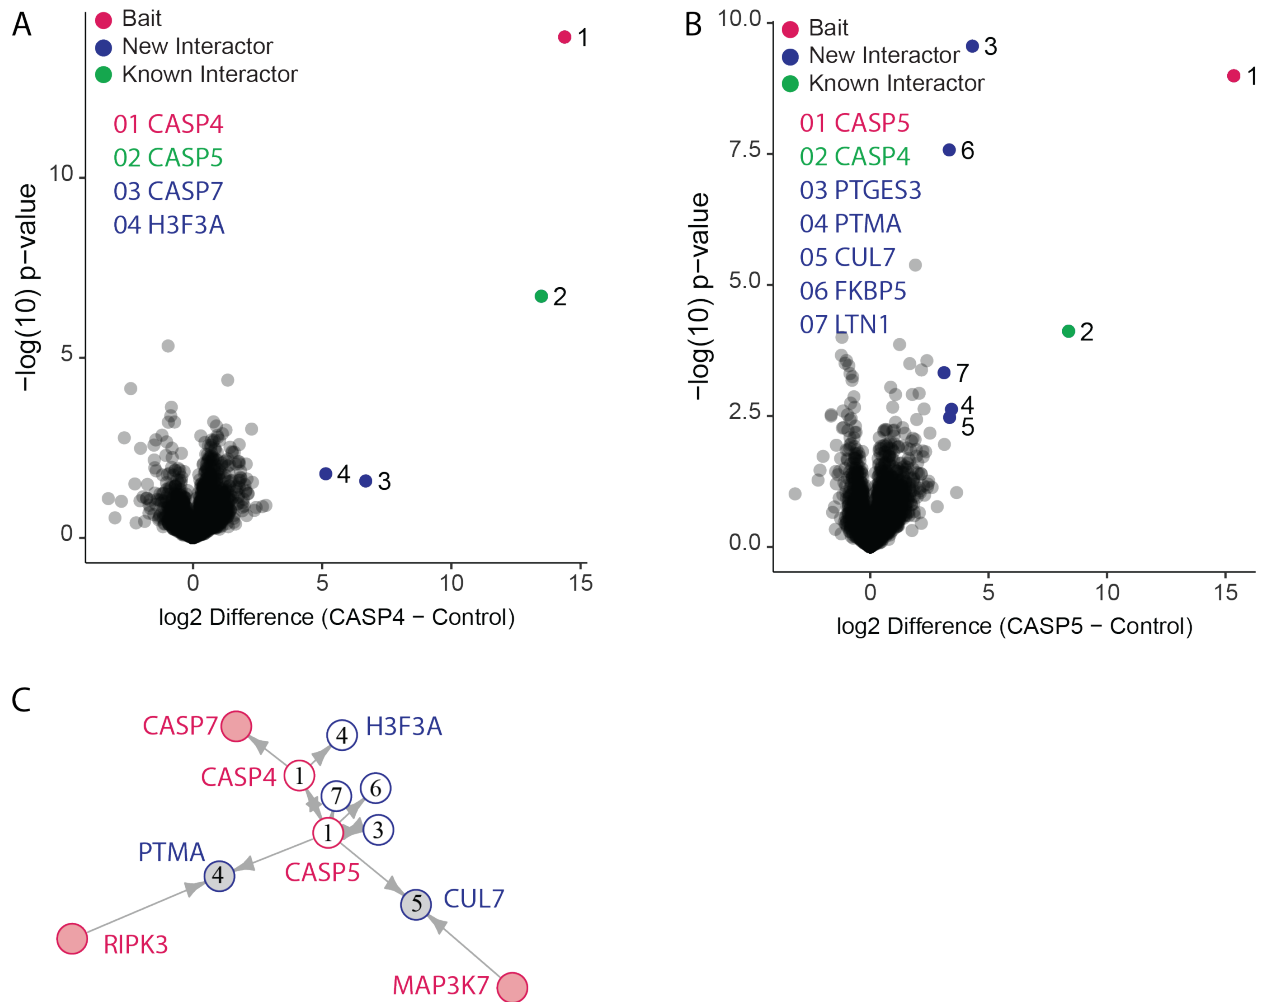

**Appendix Figure S4. Related to [Fig. 4, Table 1,2,3]: Interactions of CASP4 and CASP5 in Human Monocytes.** A) Volcano plot representing the interactome of CASP4 (measured 4x in biological replicates) compared against all other pull-downs in the control group. Significant interactors of CASP4 (two-tailed t-test, FDR < 0.01, enrichment >4) are colored in blue (novel interactors) and green (known interactors). B) Volcano plot representing the interactome of CASP5 (measured 4x in biological replicates) compared against all other pull-downs in the control group. Significant interactors of CASP5 (two-tailed t-test, FDR < 0.01, enrichment >4) are colored in blue (novel interactors) and green (known interactors). (C) Interactors of CASP4 and CASP5 (blue: novel interactors, green: known interactors) with interconnecting proteins between different baits colored in grey.

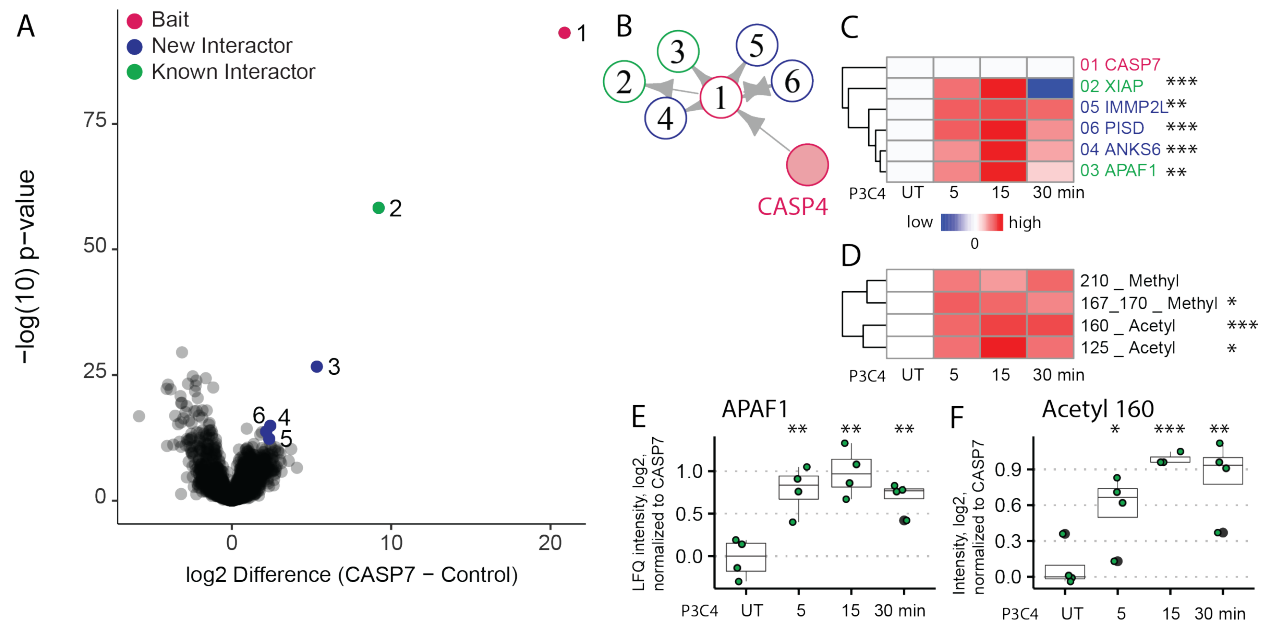

**Appendix Figure S5. Related to [Fig. 4, Table 1,2,3]: Interactions and PTMs of CASP7 in Human Monocytes.** (A) Volcano plot representing the interactome of CASP7 (measured 16x in biological replicates) compared against all other pull-downs in the control group. Significant interactors of CASP7 (two-tailed t-test, FDR < 0.01, enrichment >4) are colored in blue (novel interactors) and green (known interactors). (B) Interactors of CASP7 (blue: novel interactors, green: known interactors) with interconnecting proteins between different baits colored in grey. (C) Heatmap of significant interactors of CASP7 upon TLR2 activation of human monocytes, with significant hits (two-tailed t-test, p-value < 0.05) denoted with an asterisk. Cell activation was performed for 5, 15 and 30 min with the TLR2 ligand PAM3CSK4 (P3C4), UT was harvested after 30 min without Pam3CSK4 activation. (D) Heatmap of CASP7 PTMs (acetylation, methylation, and phosphorylation) upon TLR2 activation of human monocytes, with significant hits in at least one time-point (two-tailed t-test, p-value < 0.05) denoted with an asterisk. Cell activation was performed for 5, 15 and 30 min with the TLR2 ligand PAM3CSK4 (P3C4), UT was harvested after 30 min without Pam3CSK4 activation. (E) LFQ Intensity profile (normalized to CASP7 LFQ intensity and untreated) of CASP7 interactor APAF1 upon TLR2 activation of human monocytes. (F) Intensity profile (normalized to CASP7 Intensity and untreated) of CASP7 acetylation site K160 upon TLR2 activation of human monocytes. \*\*\*: p-value < 0.001, \*\*: p-value < 0.01, \*: p-value < 0.05).

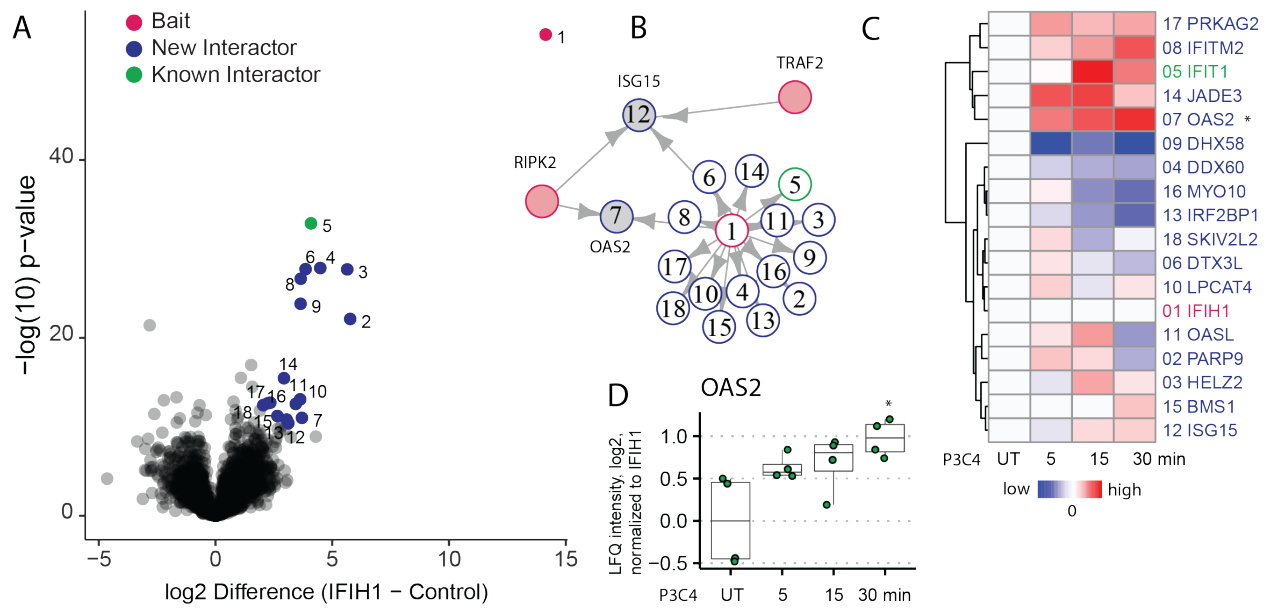

**Appendix Figure S6. Related to [Fig. 4, Table 1,2,3]: Interactions and PTMs of IFIH1 in Human Monocytes.** (A) Volcano plot representing the interactome of IFIH1 (measured 16x in biological replicates) compared against all other pull-downs in the control group. Significant interactors of IFIH1 (two-tailed t-test, FDR < 0.01, enrichment >4) are colored in blue (novel interactors) and green (known interactors). (B) Interactors of IFIH1 (blue: novel interactors, green: known interactors) with interconnecting proteins between different baits colored in grey. (C) Heatmap of significant interactors of IFIH1 (FDR < 0.01, enrichment >4) upon TLR2 activation of human monocytes, with significant hits (two-tailed t-test, p-value < 0.05) denoted with an asterisk. Cell activation was performed for 5, 15 and 30 min with the TLR2 ligand PAM3CSK4 (P3C4), UT was harvested after 30 min without Pam3CSK4 activation. (D) LFQ Intensity profile (normalized to IFIH1 LFQ intensity and untreated) of IFIH1 interactor OAS2 upon TLR2 activation of human monocytes. \*\*\*: p-value < 0.001, \*\*: p-value < 0.01, \*: p-value < 0.05).

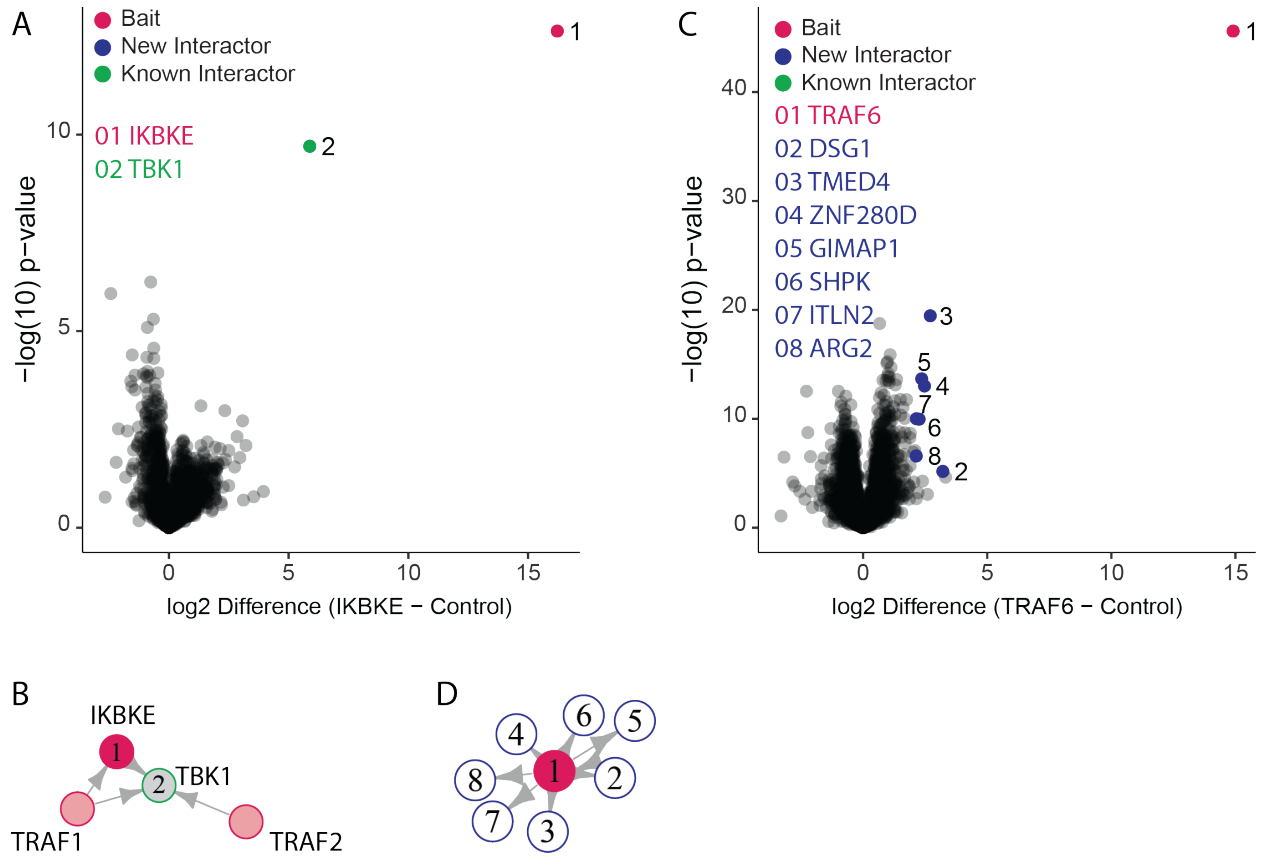

**Appendix Figure S7. Related to [Fig. 4, Table 1,2,3]: Interactions of IKBKE and TRAF6 in Human Monocytes.** A) Volcano plot representing the interactome of IKBKE (measured 4x in biological replicates) compared against all other pull-downs in the control group. Significant interactors of IKBKE (two-tailed t-test, FDR < 0.01, enrichment >4) are colored in blue (novel interactors) and green (known interactors). (B) Interactors of IKBKE (blue: novel interactors, green: known interactors) with interconnecting proteins between different baits colored in grey. (C) Volcano plot representing the interactome of TRAF6 (measured 16x in biological replicates) compared against all other pull-downs in the control group. Significant interactors of TRAF6 (two-tailed t-test, FDR < 0.01, enrichment >4) are colored in blue (novel interactors) and green (known interactors). (D) Interactors of TRAF6 (blue: novel interactors, green: known interactors) with interconnecting proteins between different baits colored in grey.



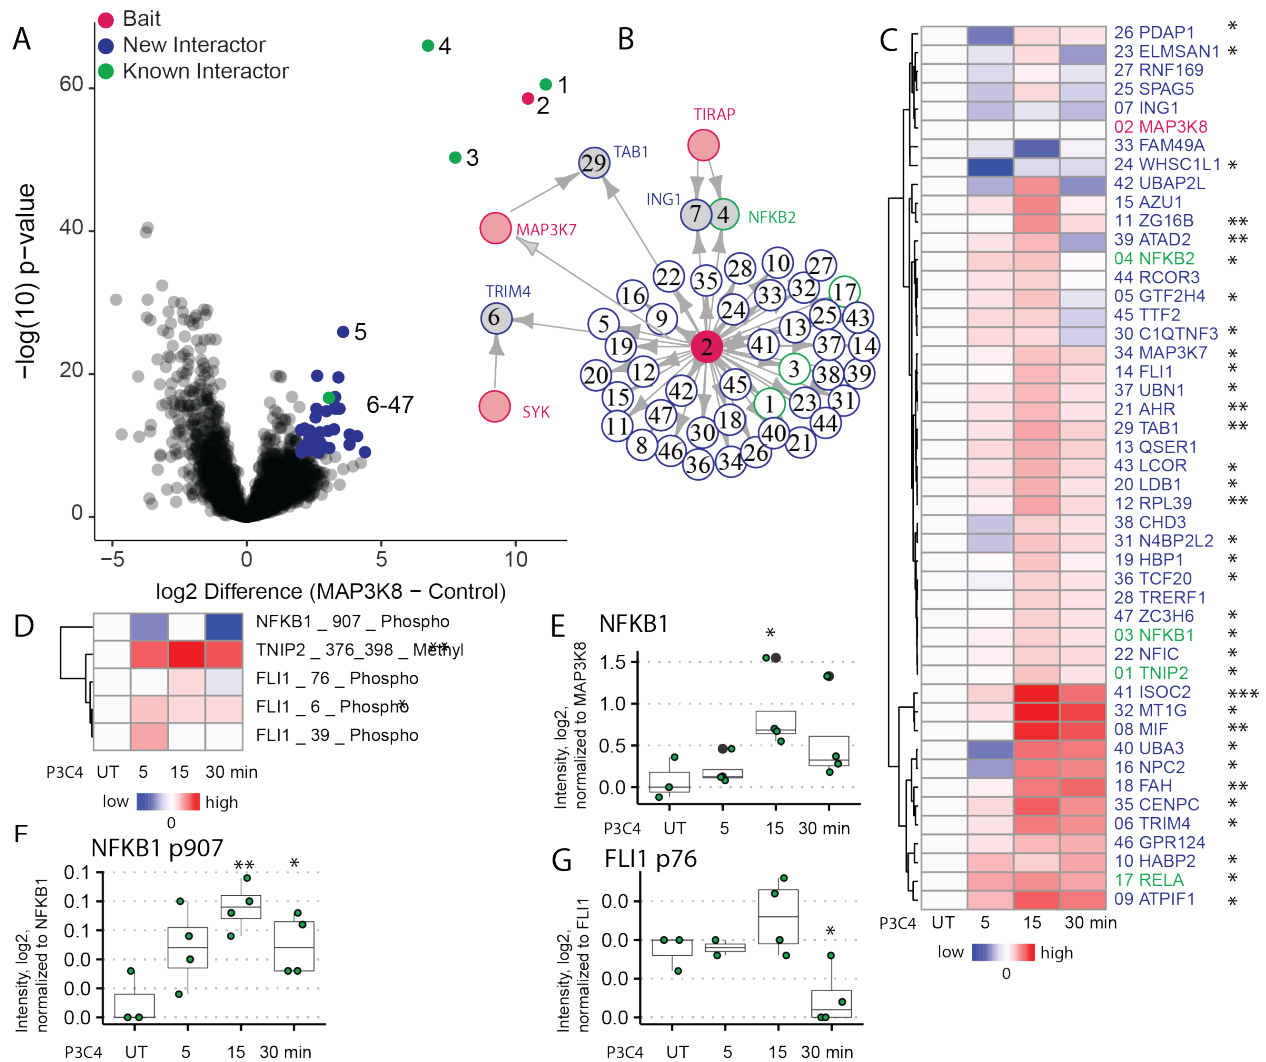

**Appendix Figure S8. Related to [Fig. 4, Table 1,2,3]: Interactions and PTMs of MAP3K8 in Human Monocytes.** A) Volcano plot representing the interactome of MAP3K8 (measured 15x in biological replicates) compared against all other pull-downs in the control group. Significant interactors of MAP3K8 (two-tailed *t*-test, FDR < 0.01, enrichment >4) are colored in blue (novel interactors) and green (known interactors). (B) Interactors of MAP3K8 (blue: novel interactors, green: known interactors) with interconnecting proteins between different baits colored in grey. (C) Heatmap of significant interactors of MAP3K8 upon TLR2 activation of human monocytes, with significant hits (two-sided *t*-test, *p*-value < 0.05) denoted with an asterisk. Cell activation was performed for 5, 15 and 30 min with the TLR2 ligand PAM3CSK4 (P3C4), UT was harvested after 30 min without Pam3CSK4 activation. (D) Heatmap of MAP3K8 PTMs (acetylation, methylation, and phosphorylation) upon TLR2 activation of human monocytes, with significant hits (two-sided *t*-test, *p*-value < 0.05) denoted with an asterisk. (E) LFQ Intensity profile of MAP3K8 interactor NFκB1 upon TLR2 activation of human monocytes, normalized to MAP3K8 bait LFQ intensity and untreated condition. (F) Intensity profile of phosphorylation of NFκB1 Ser907 upon TLR2 activation of human monocytes, normalized to NFκB1 intensity and untreated condition. (G) Intensity profile of the phosphorylation of FLI1 Ser76 upon TLR2 activation of human monocytes, normalized to FLI1 intensity and untreated condition. \*\*\*: *p*-value < 0.001, \*\*: *p*-value < 0.01, \*: *p*-value < 0.05).

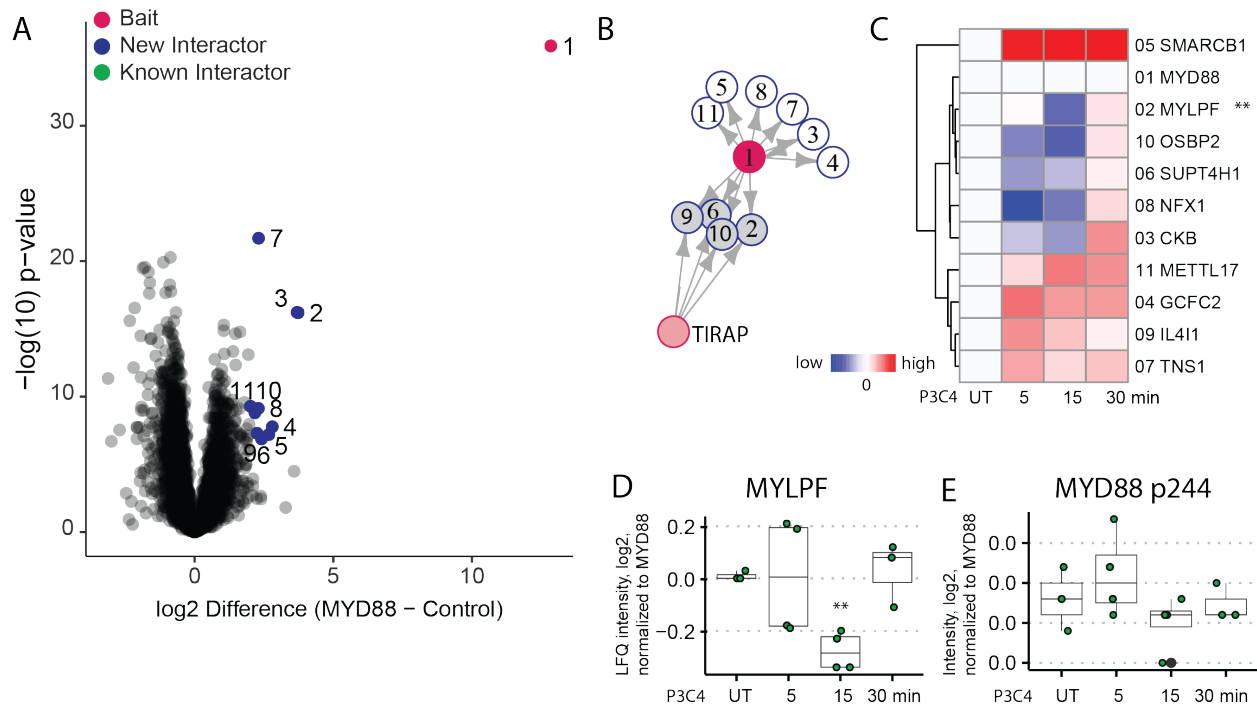

**Appendix Figure S9. Related to [Fig. 4, Table 1,2,3]: Interactions and PTMs of MYD88 in Human Monocytes.** (A) Volcano plot representing the interactome of MYD88 (measured 14x in biological replicates) compared against all other pull-downs in the control group. Significant interactors of MYD88 (two-tailed *t*-test, FDR < 0.01, enrichment >4) are colored in blue (novel interactors) and green (known interactors). (B) Interactors of MYD88 (blue: novel interactors, green: known interactors) with interconnecting proteins between different baits colored in grey. (C) Heatmap of significant interactors of MYD88 upon TLR2 activation of human monocytes, with significant hits (two-sided *t*-test, *p*-value < 0.05) denoted with an asterisk. Cell activation was performed for 5, 15 and 30 min with the TLR2 ligand PAM3CSK4 (P3C4), UT was harvested after 30 min without Pam3CSK4 activation (D) LFQ Intensity profile of MYD88 interactor MYLPF upon TLR2 activation of human monocytes, normalized to MYD88 bait LFQ intensity and untreated condition. (E) Intensity profile of phosphorylation of MYD88 position 244 upon TLR2 activation of human monocytes, normalized to MYD88 intensity and untreated condition. \*\*\*: *p*-value < 0.001, \*\*: *p*-value < 0.01, \*: *p*-value < 0.05).

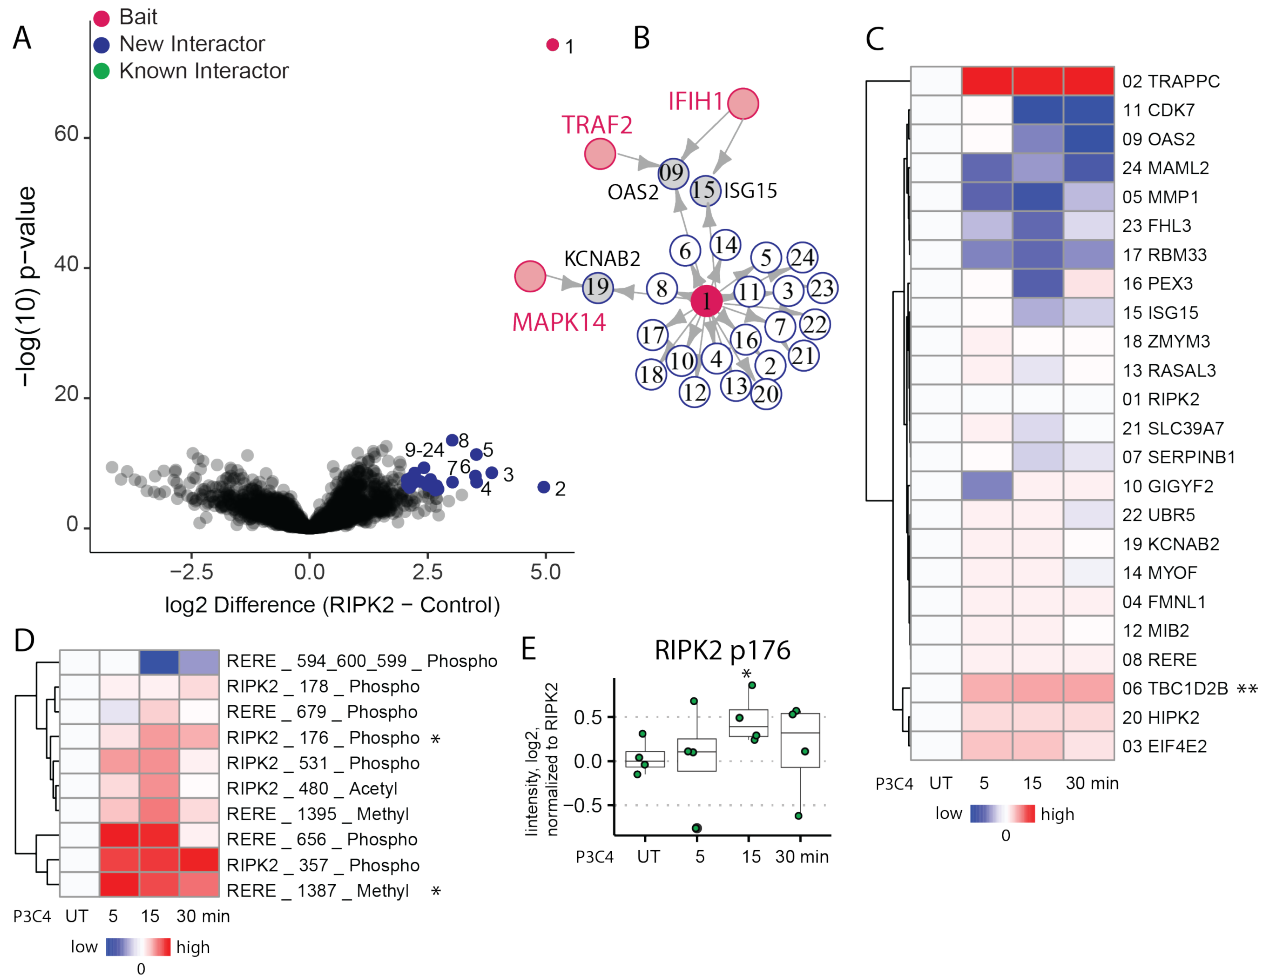

**Appendix Figure S10. Related to [Fig. 4, Table 1,2,3]: Interactions and PTMs of RIPK2 in Human Monocytes.** (A) Volcano plot representing the interactome of RIPK2 (measured 16x in biological replicates) compared against all other pull-downs in the control group. Significant interactors of RIPK2 (two-tailed *t*-test, FDR < 0.01, enrichment >4) are colored in blue (novel interactors) and green (known interactors). (B) Interactors of RIPK2 (blue: novel interactors, green: known interactors) with interconnecting proteins between different baits colored in grey. (C) Heatmap of significant interactors of RIPK2 upon TLR2 activation of human monocytes, with significant hits (two-sided *t*-test, *p*-value < 0.05) denoted with an asterisk. Cell activation was performed for 5, 15 and 30 min with the TLR2 ligand PAM3CSK4 (P3C4), UT was harvested after 30 min without Pam3CSK4 activation. (D) Heatmap of RIPK2 PTMs (acetylation, methylation, and phosphorylation) upon TLR2 activation of human monocytes, with significant hits (two-sided *t*-test, *p*-value < 0.05) denoted with an asterisk. (E) Intensity profile of RIPK2 p176 upon TLR2 activation of human monocytes, normalized to RIPK2 bait intensity and untreated condition. \*\*\*: *p*-value < 0.001, \*\*: *p*-value < 0.01, \*: *p*-value < 0.05).

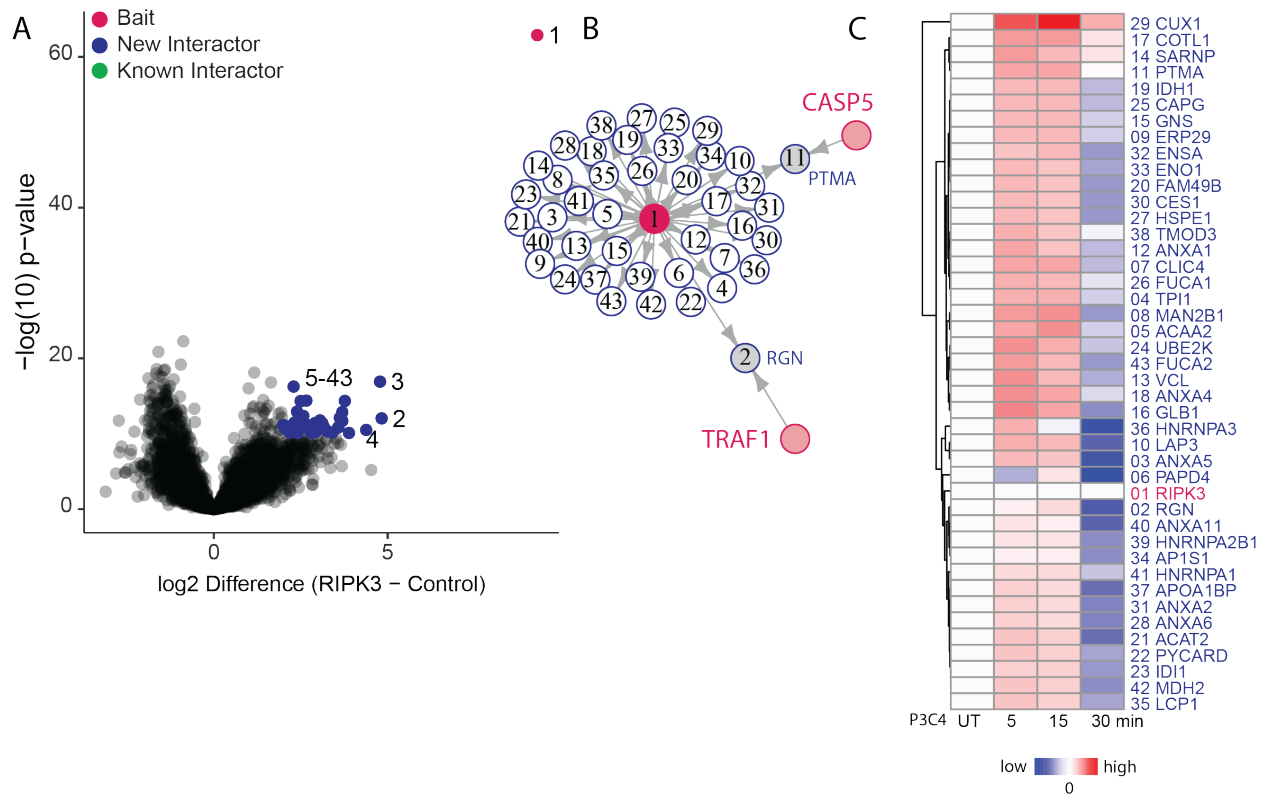

**Appendix Figure S11. Related to [Fig. 4, Table 1,2,3]: Interactions and PTMs of RIPK3 in Human Monocytes.** (A) Volcano plot representing the interactome of RIPK3 (measured 16x in biological replicates) compared against all other pull-downs in the control group. Significant interactors of RIPK3 (two-tailed *t*-test, FDR < 0.01, enrichment >4) are colored in blue (novel interactors) and green (known interactors). (B) Interactors of RIPK3 (blue: novel interactors, green: known interactors) with interconnecting proteins between different baits colored in grey. (C) Heatmap of significant interactors of RIPK3 upon TLR2 activation of human monocytes, with significant hits (two-sided *t*-test, *p*-value < 0.05) denoted with an asterisk. Cell activation was performed for 5, 15 and 30 min with the TLR2 ligand PAM3CSK4 (P3C4), UT was harvested after 30 min without Pam3CSK4 activation. \*\*\*: *p*-value < 0.001, \*\*: *p*-value < 0.01, \*: *p*-value < 0.05).

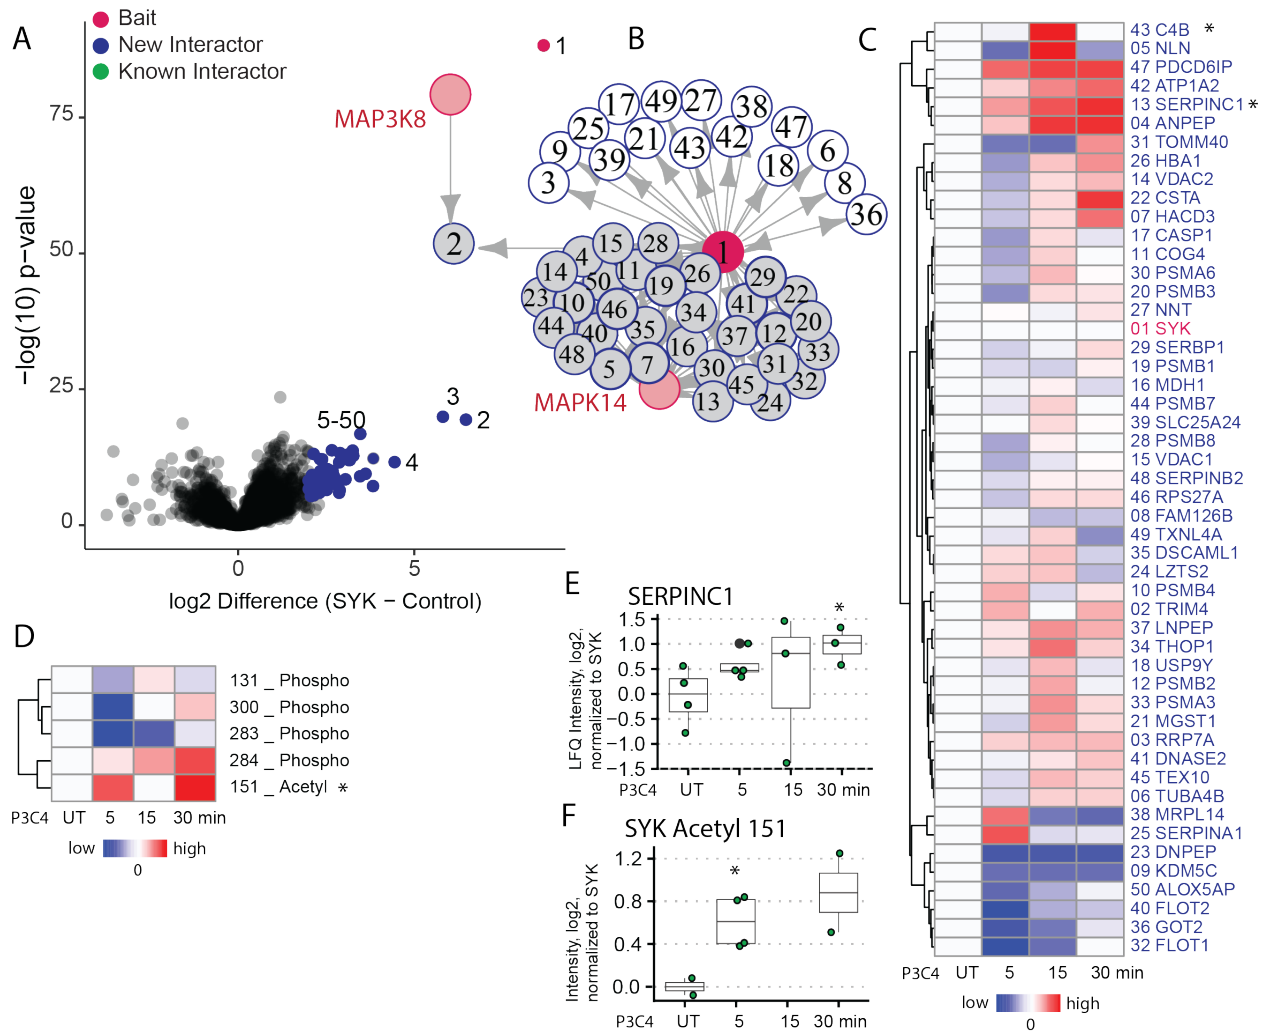

### Appendix Figure S12. Related to [Fig. 4, Table 1,2,3]: Interactions and PTMs of SYK in Human

**Monocytes.** (A) Volcano plot representing the interactome of SYK (measured 14x in biological replicates) compared against all other pull-downs in the control group. Significant interactors of SYK (two-tailed t-test, FDR < 0.01, enrichment >4) are colored in blue (novel interactors) and green (known interactors). (B) Interactors of SYK (blue: novel interactors, green: known interactors) with interconnecting proteins between different baits colored in grey. (C) Heatmap of significant interactors of SYK upon TLR2 activation of human monocytes, with significant hits (two-sided t-test, p-value < 0.05) denoted with an asterisk. Cell activation was performed for 5, 15 and 30 min with the TLR2 ligand PAM3CSK4 (P3C4), UT was harvested after 30 min without Pam3CSK4 activation. (D) Heatmap of SYK PTMs (acetylation, methylation, and phosphorylation) upon TLR2 activation of human monocytes, with significant hits (two-sided t-test, p-value < 0.05) denoted with an asterisk. (E) Lfq Intensity profile of SERPINC1 upon TLR2 activation of human monocytes, normalized to SYK bait Lfq intensity and untreated condition. (F) Intensity profile of SYK acetyl 151 upon TLR2 activation of human monocytes, normalized to SYK bait intensity and untreated condition. \*\*\*: p-value < 0.001, \*\*: p-value < 0.01, \*: p-value < 0.05).

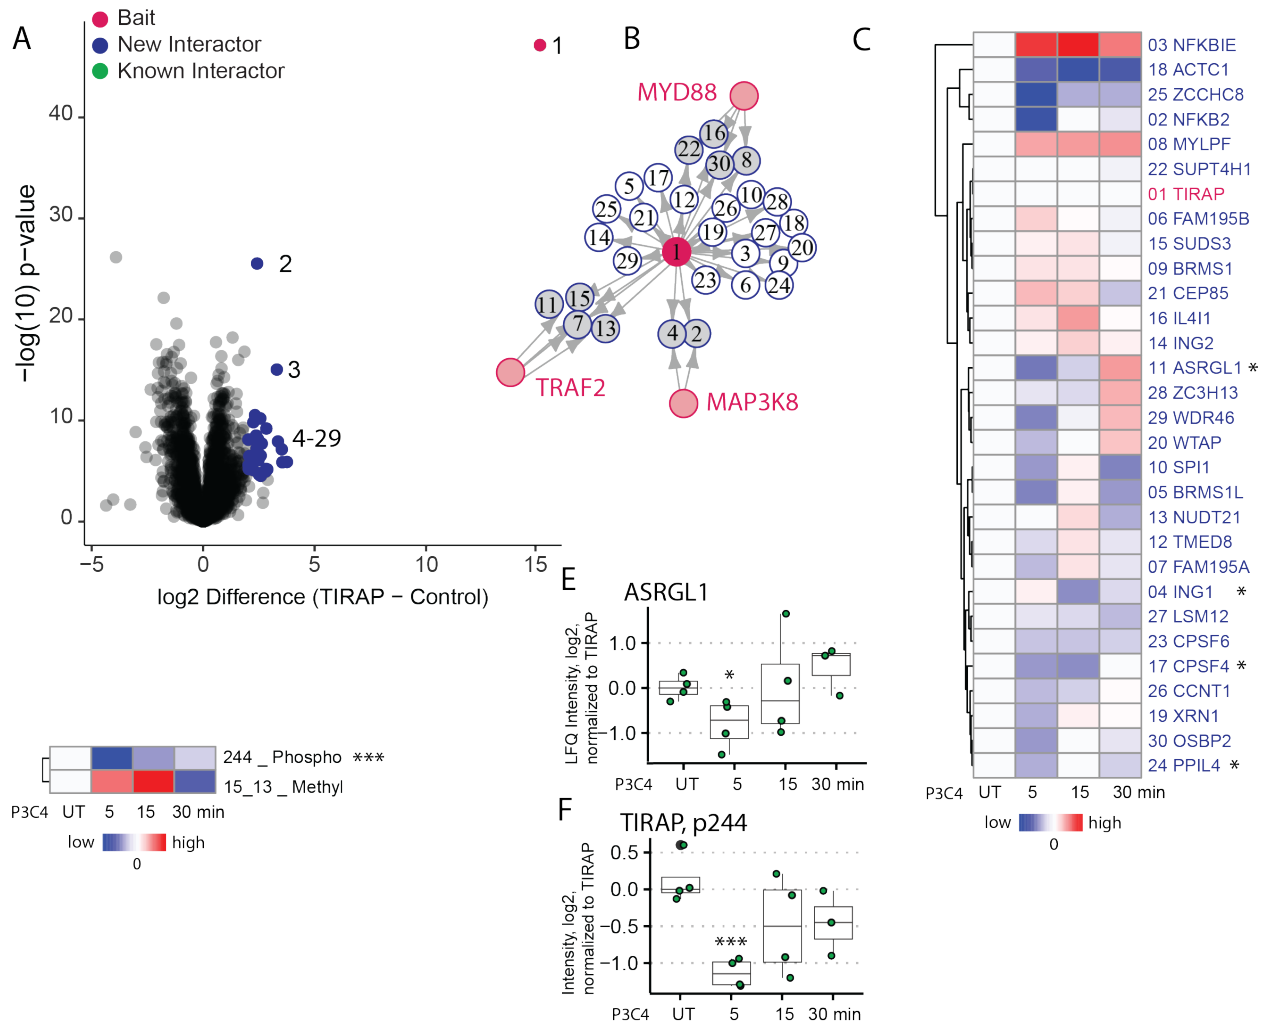

**Appendix Figure S13. Related to [Fig. 4, Table 1,2,3]: Interactions and PTMs of TIRAP in Human Monocytes.** (A) Volcano plot representing the interactome of TIRAP (measured 15x in biological replicates) compared against all other pull-downs in the control group. Significant interactors of TIRAP (two-tailed t-test, FDR < 0.01, enrichment >4) are colored in blue (novel interactors) and green (known interactors). (B) Interactors of TIRAP (blue: novel interactors, green: known interactors) with interconnecting proteins between different baits colored in grey. (C) Heatmap of significant interactors of TIRAP upon TLR2 activation of human monocytes, with significant hits (two-sided t-test, p-value < 0.05) denoted with an asterisk. Cell activation was performed for 5, 15 and 30 min with the TLR2 ligand PAM3CSK4 (P3C4), UT was harvested after 30 min without Pam3CSK4 activation. (D) Heatmap of TIRAP PTMs (acetylation, methylation, and phosphorylation) upon TLR2 activation of human monocytes, with significant hits (two-sided t-test, p-value < 0.05) denoted with an asterisk. (E) Lfq Intensity profile of ASRGL1 upon TLR2 activation of human monocytes, normalized to TIRAP bait Lfq intensity and untreated condition. (F) Intensity profile of TIRAP phospho 244 upon TLR2 activation of human monocytes, normalized to TIRAP bait intensity and untreated condition. \*\*\*: p-value < 0.001, \*\*: p-value < 0.01, \*: p-value < 0.05).

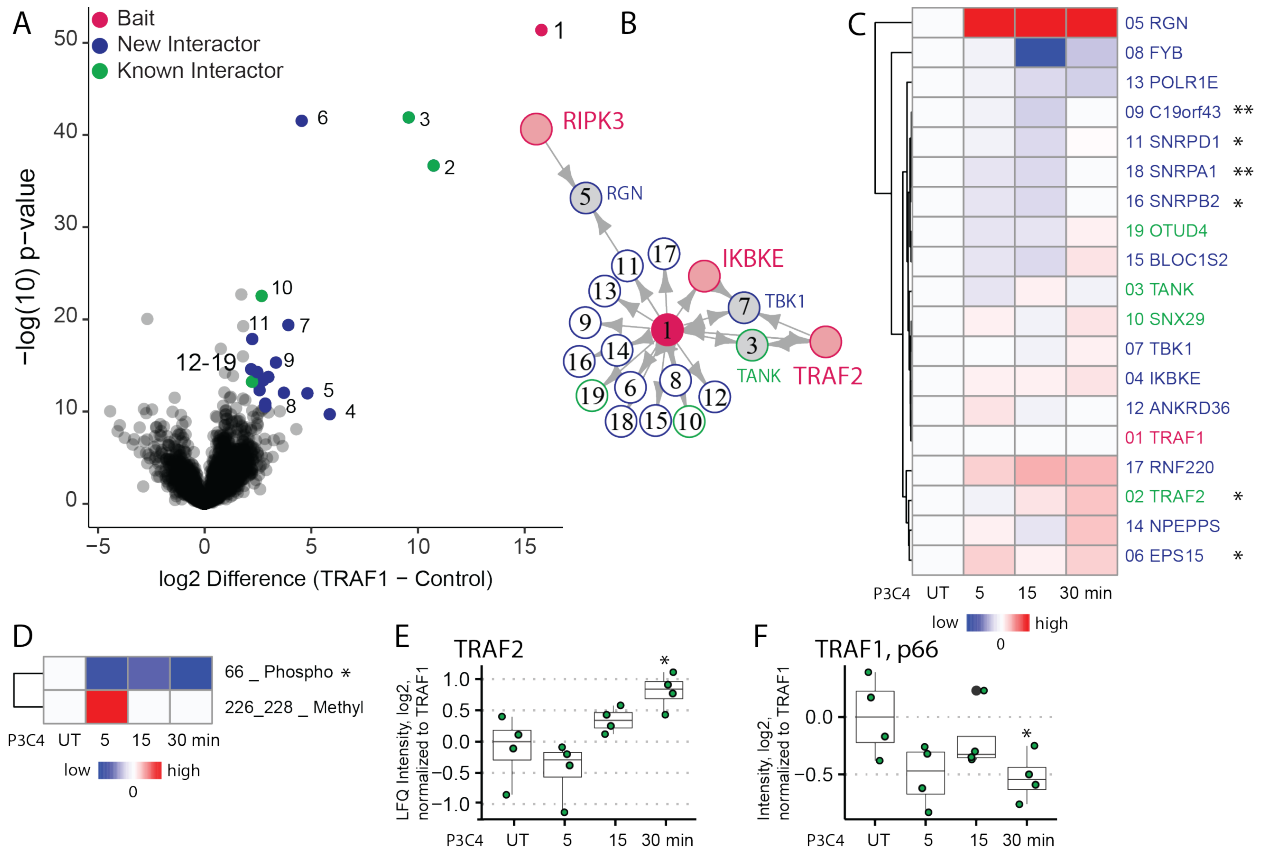

**Appendix Figure S14. Related to [Fig. 4, Table 1,2,3]: Interactions and PTMs of TRAF1 in Human Monocytes.** (A) Volcano plot representing the interactome of TRAF1 (measured 16x in biological replicates) compared against all other pull-downs in the control group. Significant interactors of TRAF1 (two-tailed t-test, FDR < 0.01, enrichment >4) are colored in blue (novel interactors) and green (known interactors). (B) Interactors of TRAF1 (blue: novel interactors, green: known interactors) with interconnecting proteins between different baits colored in grey. (C) Heatmap of significant interactors of TRAF1 upon TLR2 activation of human monocytes, with significant hits (two-sided t-test, p-value < 0.05) denoted with an asterisk. Cell activation was performed for 5, 15 and 30 min with the TLR2 ligand PAM3CSK4 (P3C4), UT was harvested after 30 min without Pam3CSK4 activation. (D) Heatmap of TRAF1 PTMs (acetylation, methylation, and phosphorylation) upon TLR2 activation of human monocytes, with significant hits (two-sided t-test, p-value < 0.05) denoted with an asterisk. (E) LFQ Intensity profile of TRAF2 upon TLR2 activation of human monocytes, normalized to TRAF1 bait LFQ intensity and untreated condition. (F) Intensity profile of TRAF1 phospho 66 upon TLR2 activation of human monocytes, normalized to TRAF1 bait intensity and untreated condition. \*\*\*: p-value < 0.001, \*\*: p-value < 0.01, \*: p-value < 0.05).

Appendix Table S1:

| Name      | Sequence (5'-->3')                                                                                              |
|-----------|-----------------------------------------------------------------------------------------------------------------|
| Primer 1  | ACCCAGCTTTCTTGTACCATCACCATCACCATCACCATCACCACCATGGTAGCGGGCGACTACA<br>AAGACGATGACGACAAGTAATGAACCGGGCGCGCCGCCCTCTC |
| Primer 2  | GTACAAGAAAGCTGGGTCCAAATTTAAATCATGGTGGAGCCTGCTTTTTTGTAC                                                          |
| Primer 3  | AGGAATGCTCGTCAAGAA                                                                                              |
| Primer 4  | GCCTGGAGACGCCATCCAC                                                                                             |
| Primer 5  | TCCATATATGGGCTATGAACTAA                                                                                         |
| Primer 6  | CTGCAGAATTCACCAC                                                                                                |
| Primer 7  | GTACAAAAAAGCAGGCTCC                                                                                             |
| Primer 8  | GTACAAGAAAGCTGGGTCC                                                                                             |
| Primer 9  | CTGCAGATATACAAGTTTGTACA                                                                                         |
| Primer 10 | CGCAAATGGGCGGTAGGCGTG                                                                                           |

Appendix Table S2: Oligonucleotides for site directed mutagenesis of TRAF2

| Name           | Sequence (5'-->3')                       |
|----------------|------------------------------------------|
| Traf2 T7E fw   | CATGGCTGCAGCTAGCGTGGAAACCCCTGGCTCCCTGGAG |
| Traf2 T7E rev  | CTCCAGGGAGCCAGGGGGTTCCACGCTAGCTGCAGCCATG |
| Traf2 T7G fw   | CATGGCTGCAGCTAGCGTGGGACCCCTGGCTCCCTGGAG  |
| Traf2 T7G rev  | CTCCAGGGAGCCAGGGGGTCCACGCTAGCTGCAGCCATG  |
| Traf2 S11D fw  | GACCCCCCTGGCGATCTGGAGTTGCTAC             |
| Traf2 S11D rev | GTAGCAACTCCAGATCGCCAGGGGGGGTC            |
| Traf2 S11G fw  | GTGACCCCCCTGGCGACTGGAGTTGCTACAG          |
| Traf2 S11G rev | CTGTAGCAACTCCAGTCCGCCAGGGGGGGTCAC        |
| K21R fw        | gcccggcttctccagaacctctctggga             |
| K21R rev       | tcccaggagggttctggagaagccgggc             |
| K27R fw        | gtacttgcttccagctctgggtcccaggagggt        |
| K27R rev       | acctctctgggaccagactggaagccaagtac         |
| K31R fw        | accaagctggaagccagatacctgtgctccgcc        |
| K31R rev       | ggcggagcacaggtatctggcttccagcttgt         |
| K115R fw       | gtattcttcagggtccctctccaggtgcatccatcact   |
| K115R rev      | agtgatggatgcacctggagaggaccctgaaagaatac   |
| K119R fw       | cagctctcgtattctctcagggtccccttcc          |
| K119R rev      | ggaaggggaccctgagagaatacagagagctg         |
| K140R fw       | cggaccaggcctctgcacgcgggac                |
| K140R rev      | gtcccgcgtgcagaggcctgtgctcg               |
| K148R fw       | ggtggcgctctcttccaccaaggcggaccag          |
| K148R rev      | ctggtcgccttggtgaaagagagcgcacc            |
| K176R fw       | cctcgtggtgcgctctcacgtctgctccg            |



|           |                                         |
|-----------|-----------------------------------------|
| K176R rev | cggagcagacgtgagagcgcaccacgagg           |
| K184R fw  | cacaagttaaggggaatctggggcagacctcgtgg     |
| K184R rev | ccacgaggtctgccccagattccccttaactgtg      |
| K194R fw  | cgggggatcttcttctgcccagccgtcac           |
| K194R rev | gtgacggctgcggcagaaagaagatcccccg         |
| K195R fw  | cccgggggatcttcttctgcccagccg             |
| K195R rev | cggctgcggaagagaaagatccccggg             |
| K196R fw  | ttctcccggggattcttcttctgcccagcc          |
| K196R rev | ggctgcggaagaagagaatccccgggagaa          |
| K201R fw  | tgacgtgttctgaaatctctcccggggatctt        |
| K201R rev | gaagatccccgggagagatttcaggaccacgtca      |
| K207R fw  | ctcgacactgccacaagtctgacgtgtctgaaactc    |
| K207R rev | gaagttcaggaccacgtcagaactgtggcaagtgtcgag |
| K211R fw  | ctgcaagggactcgacatctgccacaagcttgacgt    |
| K211R rev | acgtcaagactgtggcagatgtcgagtccttgcag     |
| K231R fw  | cgtgctcctgtgtctctcacccttacc             |
| K231R rev | ggtagagggtgagagacagcaggagcacg-          |
| K255R fw  | ccaagaggggtcttgctccagcaccgagctc         |
| K255R rev | gagctcgggtgctggaggcaagaccctcttg         |
| K277R fw  | caaaagtggccttctctccaggctctcgac          |
| K277R rev | gtgagagacctggagagaaagacggccactttg       |
| K278R fw  | ttctaaaagtggccttctctccaggctctcg         |
| K278R rev | gcgagagcctggagaagagaacggccactttgagaa    |
| K313R fw  | ctactcagggttcaattctgttcttccagccggt      |
| K313R rev | accggctggaccaagacagaattgaagccctgagtag   |
| K320R fw  | ctccagctgctgactctgctactcagggcttc        |
| K320R rev | gaagccctgagtagcagagtgacagcagctggag      |
| K331R fw  | gccatcgccaggctctgaggccaatgtctc          |
| K331R rev | ggagcattggcctcagagacctggcgatggc         |
| K341R fw  | cctccatctccaagactctgctccaagtcagcc       |
| K341R rev | ggctgactggagcagagagtcttgagatggagg       |
| K357R fw  | cctggcgaagtctgagattctccagatgaagacccatc  |
| K357R rev | gatgggtcttcatctggagaatctcagacttcgccagg  |
| K364R fw  | tcctggcgctcctggcgaagtctgag              |
| K364R rev | ctcagactcgccaggaggcgccagga              |
| K389R fw  | gatacgagacacatcctgtagccgtacctgct        |
| K389R rev | agcaggctacggctacaggatgtgtctgcgtatc      |
| K415R fw  | cattcggggcccctcatcaccacaaagaagagg       |
| K415R rev | ccctctcttctgtgtgatgagggggcccgaatg       |
| K429R fw  | taaggcaccctctggtgaaggccaccg             |

|           |                                   |
|-----------|-----------------------------------|
| K429R rev | cggtggccctcaaccagaggggtgacctta    |
| K477R fw  | tctttgcctccatcctggagacggggcag     |
| K477R rev | ctgccccgtctccaggatggaggcaaaga     |
| K481R fw  | ccgcacgtaggaattccttgctccatcttga   |
| K481R rev | tccaagatggaggcaaggaattcctacgtgagg |
| K493R fw  | ccacaatggccctgatgaagatggcatcgccc  |
| K493R rev | gggacgatgccatcttcatcagggccattgtgg |

Appendix Table S3: Oligonucleotides for CRISPR-Cas9 gene knockout

| Name             | Sequence (5'-->3')         |
|------------------|----------------------------|
| fw_non-target_1  | CACCGGGGAGGTGGCTTTAGGTTTT  |
| fw_non-target_2  | CACCGACCACTAATGAGATTCTTGT  |
| fw_non-target_3  | CACCGGGGCAGAAGTTGCTGTCCTG  |
| fw_non-target_4  | CACCGTCAGCAAAGGACGAAACAAA  |
| fw_non-target_5  | CACCGGACAGTGAAATTAGCTCCCA  |
| fw_non-target_6  | CACCGTTACCCCTATTATAATGAA   |
| rev_non-target_1 | AAACAAAACCTAAAGCCACCTCCCC  |
| rev_non-target_2 | AAACACAAGAATCTCATTAGTGGTC  |
| rev_non-target_3 | AAACCAGGACAGCAACTTCTGCCCC  |
| rev_non-target_4 | AAACTTTGTTTCGTCCTTTGCTGAC  |
| rev_non-target_5 | AAACTGGGAGCTAATTTCACTGTCC  |
| rev_non-target_6 | AAACTTCATTATAATAGGGGTAAGC  |
| fw_Arhgef18_1    | CACCGGACCATACCTTCTACAAAAA  |
| fw_Arhgef18_2    | CACCGGAGGCGGTGTAGGGATCTGA  |
| fw_Arhgef18_3    | CACCGGCAACTTCTCCATCGTGCGG  |
| fw_Foxk2_1       | CACCGGCTTTAGGATGCTTTGCGTG  |
| fw_Foxk2_2       | CACCGGTTCCCGTGGGGGAGGGCAG  |
| fw_Foxk2_3       | CACCGGCCGCACCTGATGGTTCCCG  |
| fw_Fosb_1        | CACCGGGGGTCTCCTAGGCCGGGCT  |
| fw_Fosb_2        | CACCGGCGGAACTACCAGTGGGCCT  |
| fw_Fosb_3        | CACCGGTCGACGACCGGGGGCTGGG  |
| fw_Map3k7_1      | CACCGGAGGAAAGCGTTTATTGTAG  |
| fw_Map3k7_2      | CACCGGAGTTGTTTGCAAAGCTAAG  |
| fw_Map3k7_3      | CACCGGTTTGTTTAACTCAGGTTGT  |
| rev_Map3k7_3     | AAACACAACCTGAGTTAAACAAACC  |
| rev_Map3k7_2     | AAACCTTAGCTTTGCAAACAACCTCC |
| rev_Map3k7_1     | AAACCTACAATAAACGCTTTCCTCC  |
| rev_Fosb_3       | AAACCCCAGCCCCCGGTCGTCGACC  |
| rev_Fosb_2       | AAACAGGCCCACTGGTAGTTCGGCC  |
| rev_Fosb_1       | AAACAGCCCCGCCTAGGAGACCCCC  |
